# Supplementary material
Source: PubMed Central journal article supplement (PMC2529042)
Supplement: 0806019105_0806019105SI.pdf [file 0806019105_0806019105SI.pdf]

# Supporting Information

Wu et al. 10.1073/pnas.0806019105

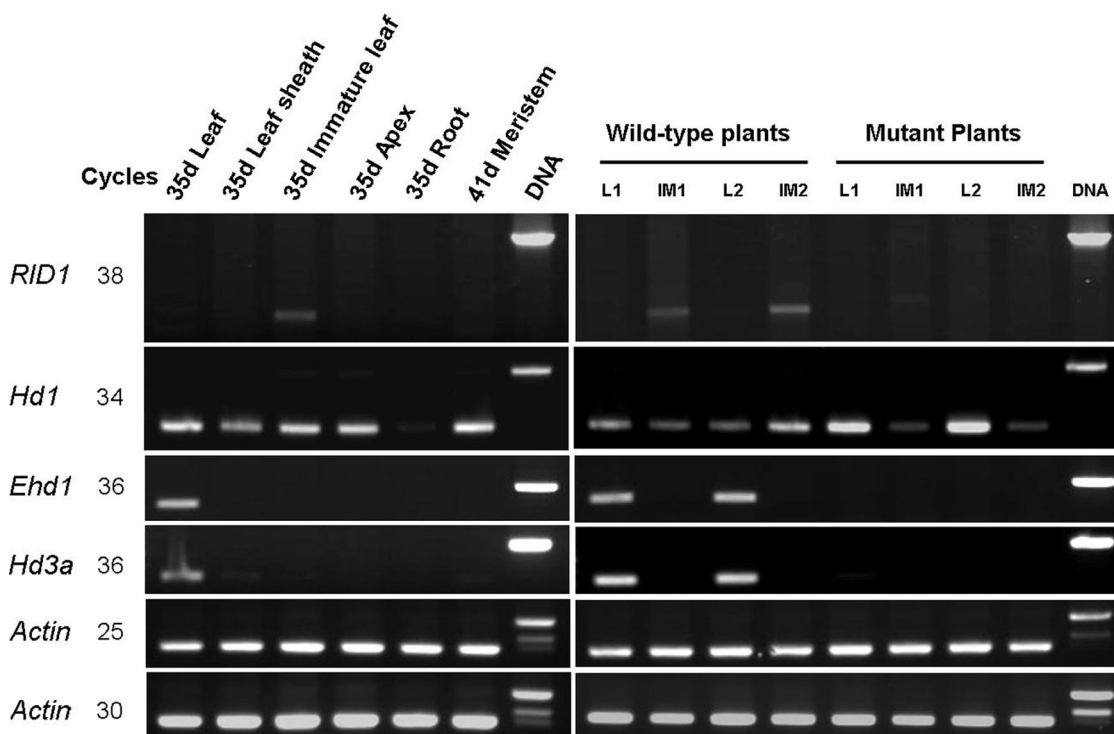

**Fig. S1.** RT-PCR analysis of the expression patterns of *RID1*, *Hd1*, *Ehd1*, *Hd3a* genes in various tissues in WT and *rid1* plants. *Actin* was used as a control for mRNA levels. L and IM indicate mature leaves and immature leaves, respectively. In this analysis, the TRIzol reagent (Invitrogen) was used according to the manufacturer's instructions to extract total RNAs. Total RNA was treated with amplification-grade DNase I (Invitrogen) for 15 min to degrade any contaminating residual genomic DNA. The synthesis of the cDNA first strand was carried out with SuperScriptII reverse transcriptase (Invitrogen) according to the manufacturer's instructions. Approximately 1/20 of the first-strand cDNA generated from 1  $\mu$ g of total RNA was used as a template for PCR in a reaction volume of 20  $\mu$ l with the TaqDNA polymerase (Promega). The PCR was performed with specific primers listed in Table S2 in an ABI 9700 thermocycler (Applied Biosystems) with the following cycling profile: 94°C for 5 min; 28–38 cycles at 94°C for 1 min, 58°C for 1 min, 72°C for 1.5 min; and 72°C for 10 min. Ten microliters of the PCR product was separated in a 1.0% agarose gel and stained with ethidium bromide for visualization.

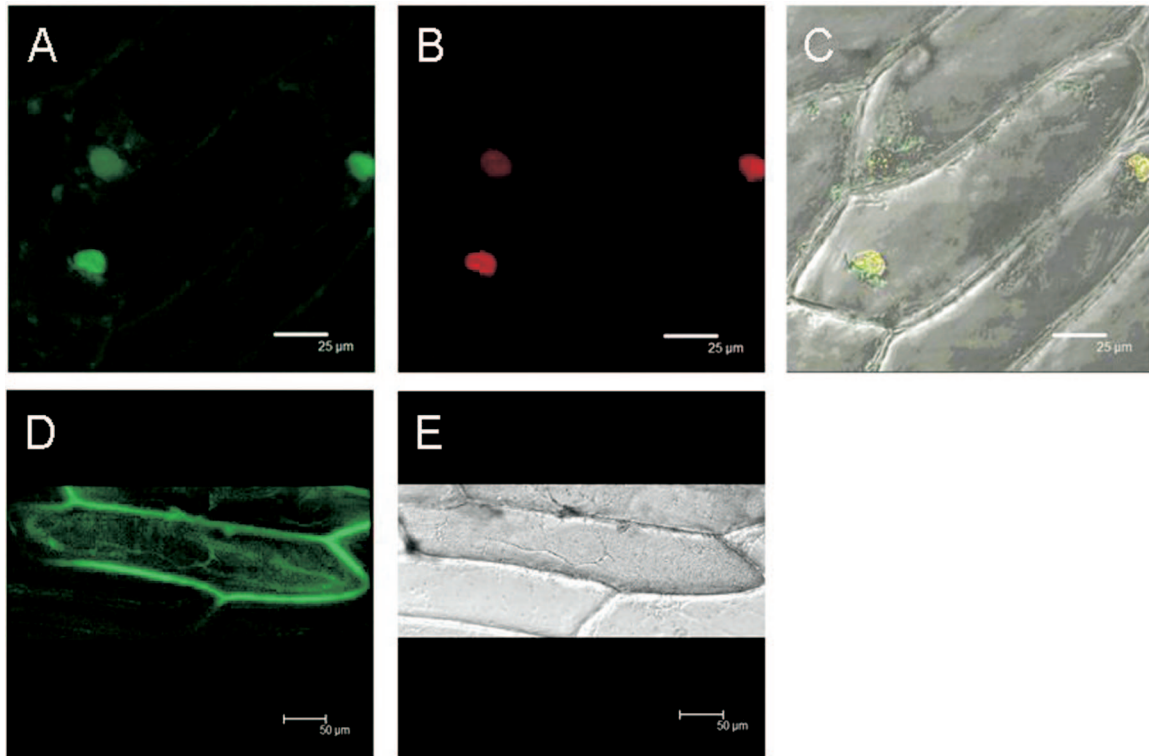

**Fig. S2.** Nuclear localization of the  $\Delta$ RID1-GFP protein revealed by bombardment of onion epidermal cells. (A) GFP signal in the nuclei. (B) The same cells stained with DAPI. (C) Their merged image. (Scale bar,  $25\mu\text{m}$ .) (D) Onion epidermal cells bombarded with the construct having GFP alone as the control and showing fluorescence in the cytosol and plasma membrane. (E) The same cells in transmission image. (Scale bar,  $50\mu\text{m}$ .) For performing this assay, the N-terminal fragment of *RID1* coding region was amplified by PCR, using the primer pair RID1NLS (Table S1), and inserted into the BamHI-KpnI site of Ubiquitin-GFP-NOS plasmid (1) in frame with the C terminus of a RID1 peptide. Bombardment of onion epidermal cells was performed as described (1). The expression of the fusion protein of RID1 and GFP in the onion epidermal cells was observed by using a laser scanning confocal microscope (LEICA TCS SP2) 36 h after bombardment.

1. Huang LM, et al. (2007) Down-regulation of a *SILENT INFORMATION REGULATOR2*-related histone deacetylase gene, *OsSRT1*, induces DNA fragmentation and cell death in rice. *Plant Physiol* 144:1508–1519.









**Table S1. Primers for RT-PCR analysis**

| Primer name | Sequence (5'-3')            | Amplified size |          |
|-------------|-----------------------------|----------------|----------|
|             |                             | Genome, bp     | cDNA, bp |
| OsActinL    | CAATCGTGAGAAGATGACCC        | 644            | 395      |
| OsActinR    | GTCCATCAGGAAGCTCGTAGC       |                |          |
| RID1-RT1L   | TCGAGCTATTGTCGTCGTTG        | 2,172          | 647      |
| RID1-RT1R   | GGAAGAGGGTGTACGTGTGC        |                |          |
| Hd3a-L      | TCAGGGTTTTTTGCAAGATCGATGG   | 620            | 325      |
| Hd3a-R      | ACGCTGCAGTAGTACCAGGAATATC   |                |          |
| Hd1-L       | GTTTGCAGAGAAGGAAGGGAGCGAGTG | 1,038          | 401      |
| Hd1-R       | GGTCGTGCCTCTGCATACGCCTTCTTG |                |          |
| Ehd1-L      | CGAAAGCAAATGCAAGATCA        | 498            | 349      |
| Ehd1-R      | TGGCAACTTGCTCTCTTGTGTC      |                |          |

**Table S2. Primers for genotyping analysis and vector construction**

| Primer name | Sequence (5'-3')               |
|-------------|--------------------------------|
| P1          | AAGGACGACTGTGGATTGAT           |
| P2          | TCTTCTTCCTGTTCTTGCTCT          |
| P3          | AATCCAGATCCCCGAATTA            |
| T-primer-F  | GGCATCGGTAAACATCTGCT           |
| T-primer-R  | GCCTCAAGAAGCTCAAGTGC           |
| RG-F-F      | CACCCCTTATGTGTGCATGCTCTCT      |
| RG-F-R      | GAAGTTGTGGCTCCACGT             |
| RID1NLS-F   | AAAGGATCCTTCTTGATCCCGGTCAGGTC  |
| RID1NLS-R   | AAAGGTACCTCGTATGGTGGTGGGTAGCC  |
| RID1-Rec2-F | AAAGAATTC CACAACCTCCCTGGAAGCTC |
| RID1-Rec2-R | AAAGGATCC CGCAGTCGCAGCGGTACTCG |
